# Supplementary material for: A Pseudomonas T6SS effector recruits PQS-containing outer membrane vesicles for iron acquisition
Source: PubMed Central journal article supplement (PMC5379069; doi:10.1038/ncomms14888), 2017-03-28
Supplement: ncomms14888-s1.pdf [file ncomms14888-s1.pdf]

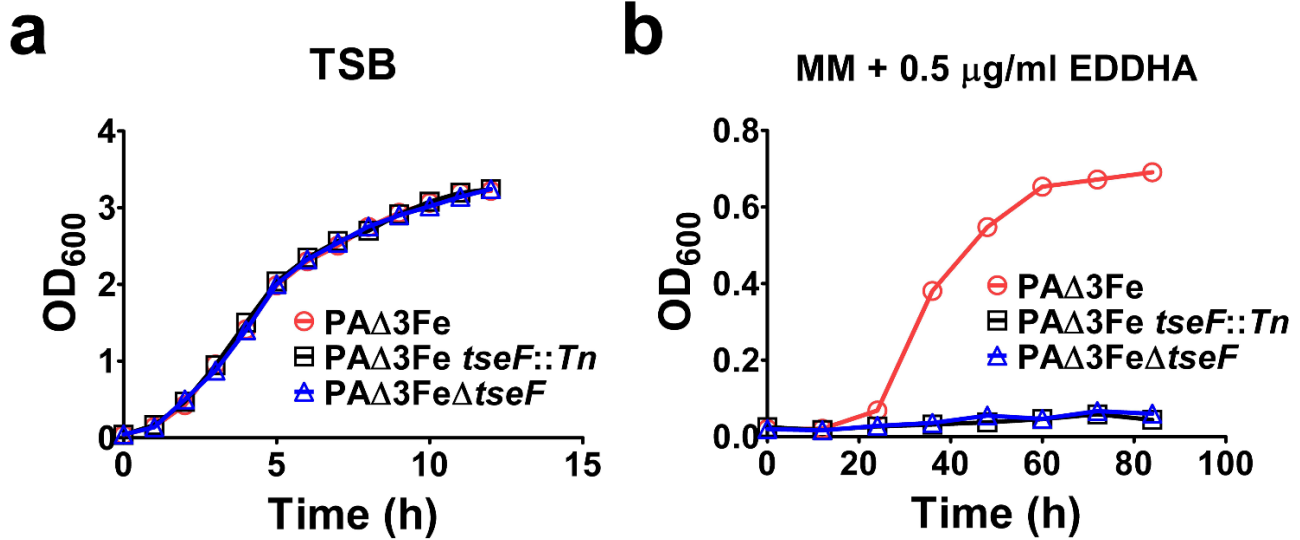

**Supplementary Figure 1. The growth of the *tseF* transposon mutant in iron deficient media.** Relevant bacterial strains were grown in TSB or succinate minimal medium containing EDDHA (0.5  $\mu\text{g/ml}$ ). Cell growth was monitored by measuring OD<sub>600</sub>. The curves represent three biological replicates; error bars are standard deviations.

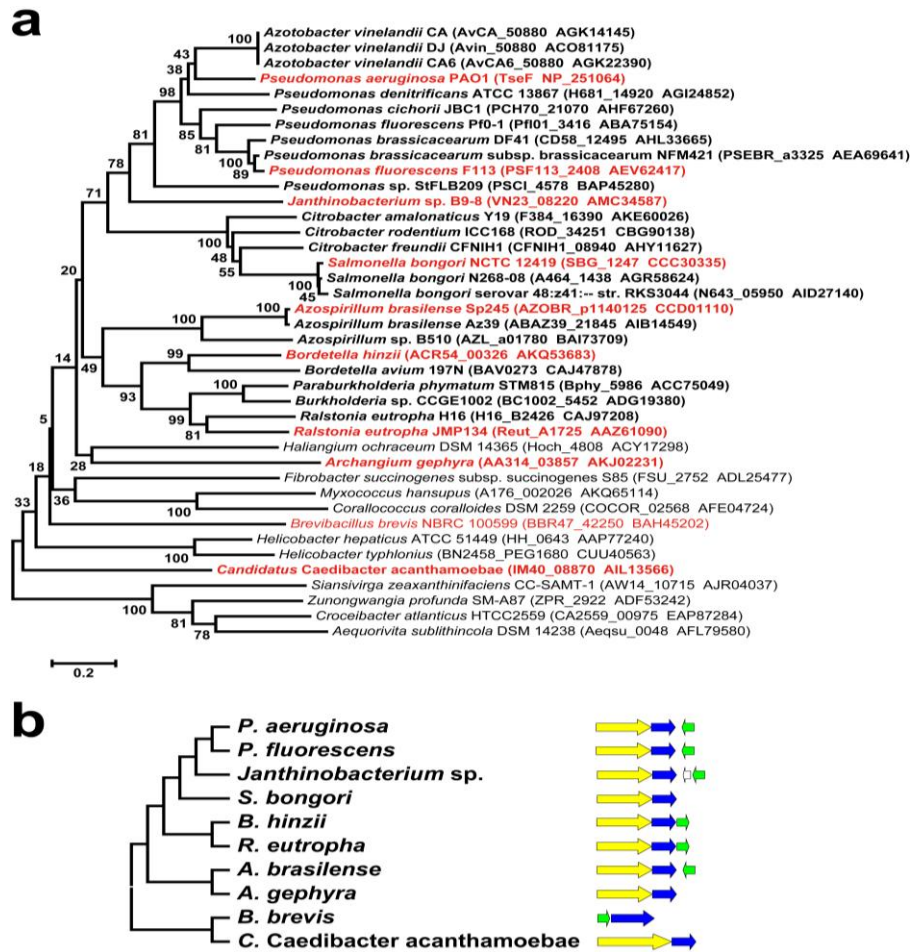

**Supplementary Figure 2. Phylogenetic analysis of the TseF protein family. (a)**

Phylogenetic tree of identified members of the TseF protein family generated from a full-length alignment of amino acid sequence. Bootstrap values for 1000 replicates depicted. Scale in residue changes/site. *tseF* genes adjacent to *vgrG* genes are indicated in boldface. Proteins encoded by the genes shown in panel **b** are indicated in red. **(b)** Evolutionary trees, genetic organization, and phylogenetic distribution of select TseF family members. Genes are colored by their predicted protein product (blue, TseF homologs containing MORN<sub>2</sub> motifs; yellow, VgrG homologs; green, PAAR-repeat containing proteins). Note the syntenic relationship between *tseF* and *vgrG* in different bacterial species.

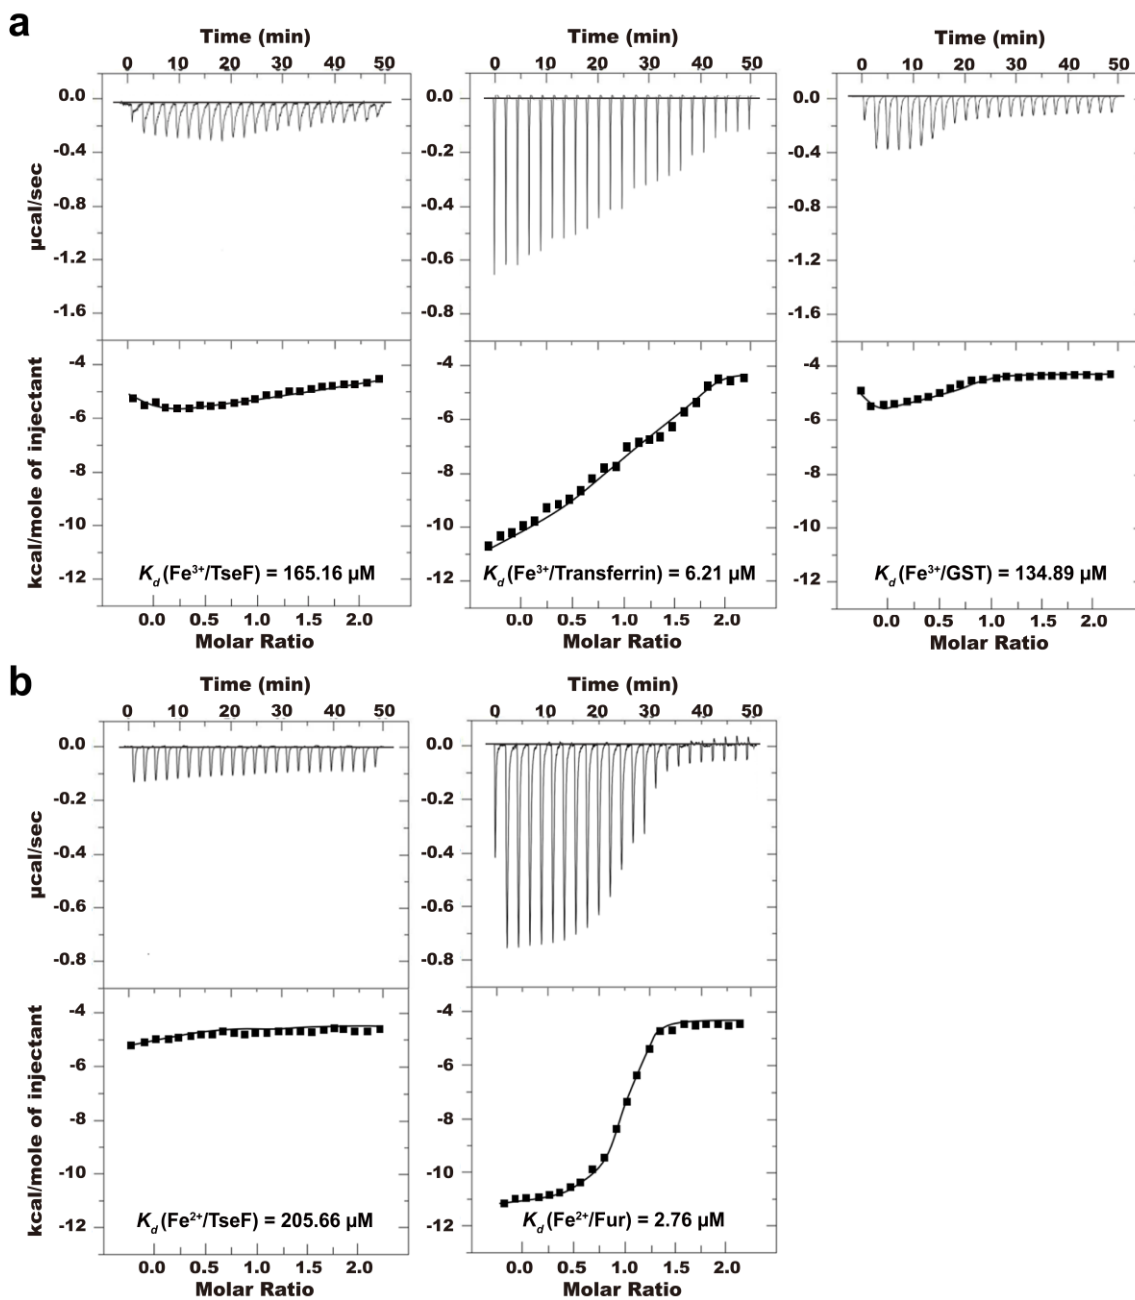

**Supplementary Figure 3. TseF does not detectably bind iron.** The binding of recombinant TseF to iron was measured by isothermal titration calorimetry (ITC). Note the large  $K_d$  value indicating of no productive binding. The iron-binding protein transferrin was used as a positive control for  $\text{Fe}^{3+}$ , while GST was used as a negative control. The iron binding protein Fur was used as a positive control for  $\text{Fe}^{2+}$ .

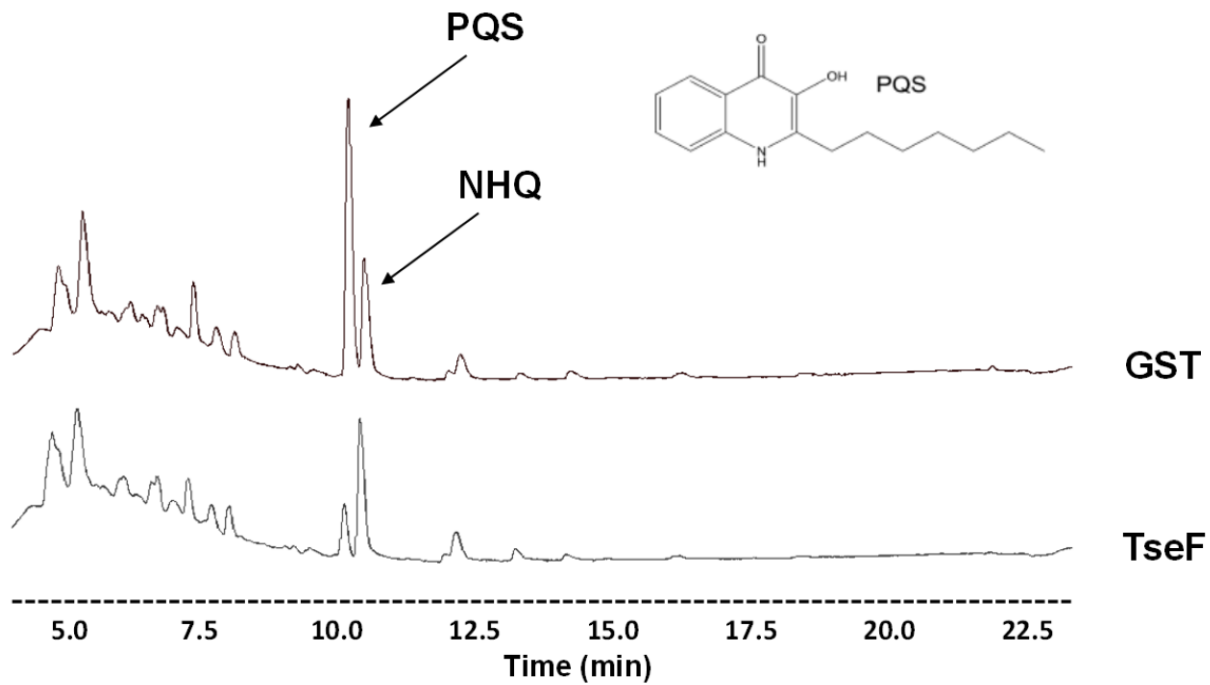

**Supplementary Figure 4. The titration of PQS from bacterial culture supernatant by TseF.** GST or TseF was incubated with culture supernatant of *P. aeruginosa*. After removing the protein, the culture supernatant was analyzed by LC-MS. The peak next to P QS was identified to be NHQ (2-nonyl-4-hydroxyquinoline). Note that the peak corresponding to P QS was greatly reduced in samples that had been incubated with TseF.

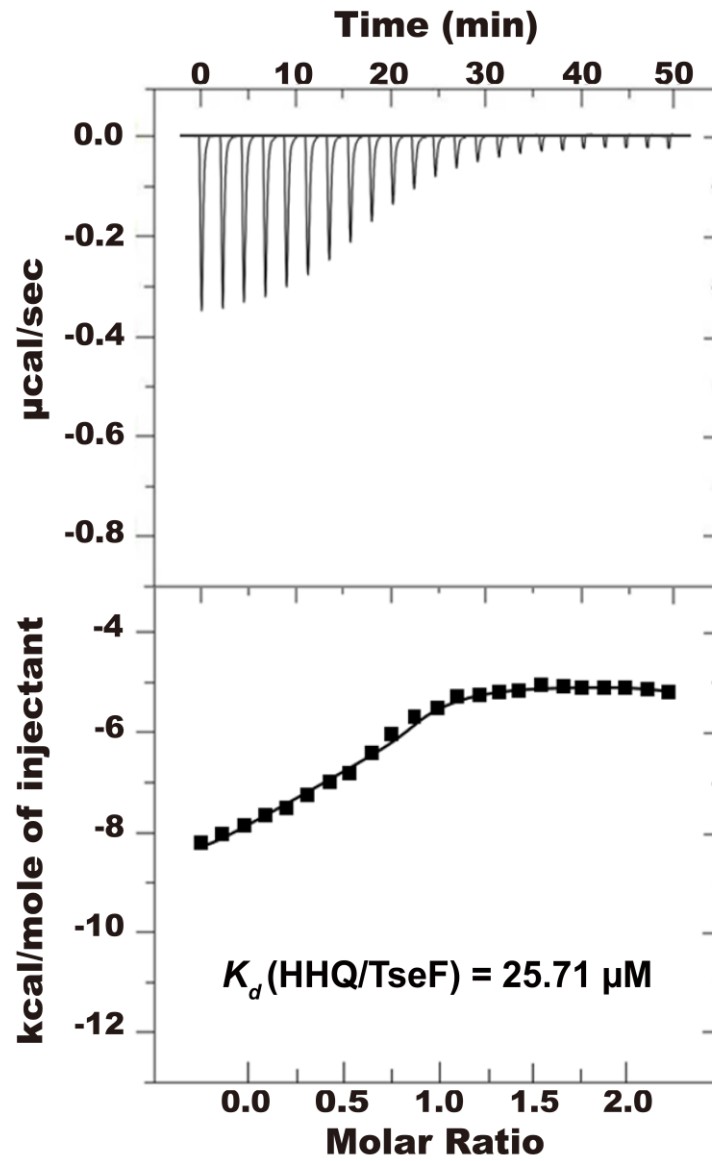

**Supplementary Figure 5. TseF weakly binds HHQ.** The binding of recombinant TseF to HHQ was measured by isothermal titration calorimetry (ITC).

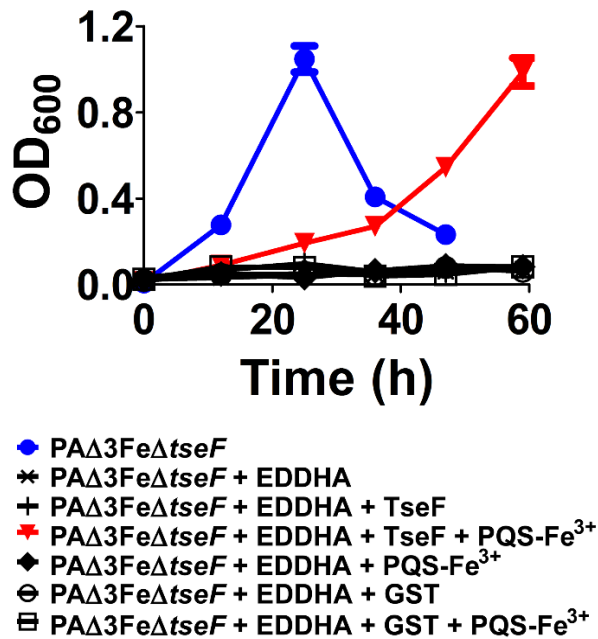

**Supplementary Figure 6. Recombinant TseF mediates iron utilization by *P. aeruginosa*.**

The growth of the indicated bacterial strains was evaluated in medium supplemented with the indicated reagents. Note that in the presence of the iron chelator EDDHA (5 μg/ml), only the culture receiving TseF and PQS-Fe<sup>3+</sup> simultaneously grew. The curves represent three replicates; error bars indicate standard deviations.

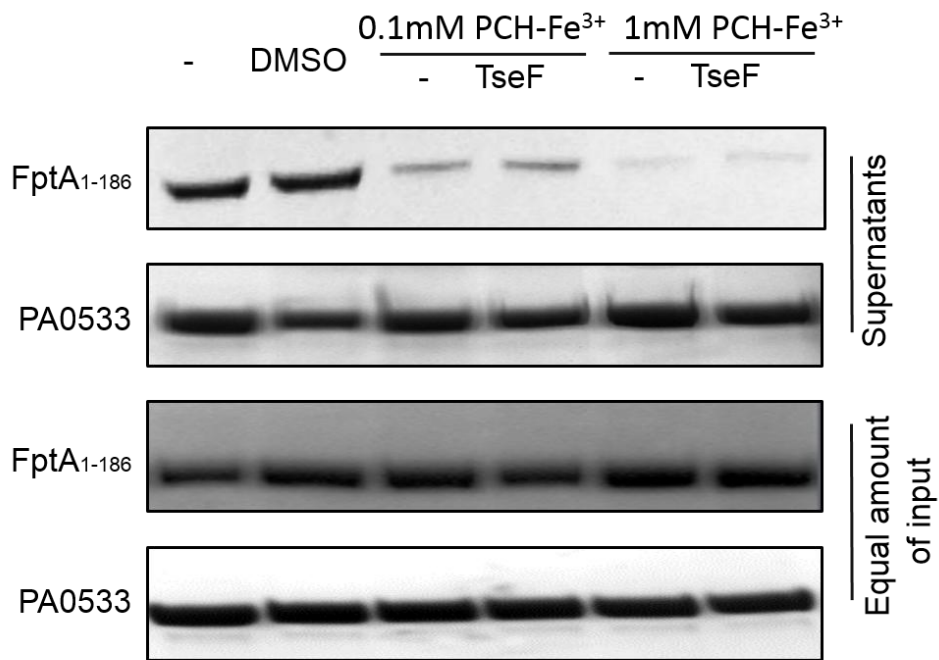

**Supplementary Figure 7. TseF does not detectably affect the interaction between FptA and PCH-Fe<sup>3+</sup>.** 0.02 mM FptA<sub>1-186</sub> protein was added to high concentration PCH-Fe<sup>3+</sup> solutions (0.1 and 1 mM) with or without 0.02 mM TseF. The mixture was incubated at room temperature for 30 min followed by centrifugation. The supernatants were subjected to SDS-PAGE analysis. The PCH-Fe<sup>3+</sup> complexes did not induce the precipitation of PA0533, a transcriptional regulatory protein served as a negative control. Full blots are shown in Supplementary Fig. 14.

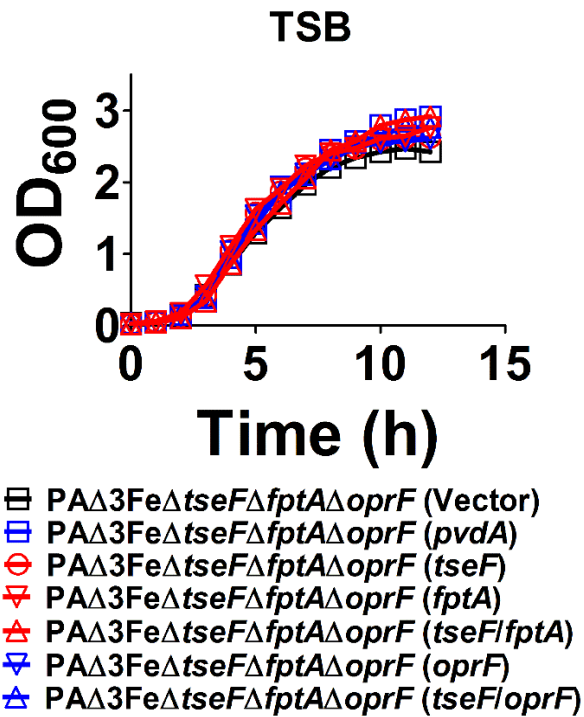

**Supplementary Figure 8. A *P. aeruginosa* lacking known iron transporters grows normally in a rich medium.** The growth of the indicated bacterial strains was monitored by measuring the absorbance at 600 nm. Note that the testing strain grew indistinguishably. The curves represent three replicates; error bars indicate standard deviations.



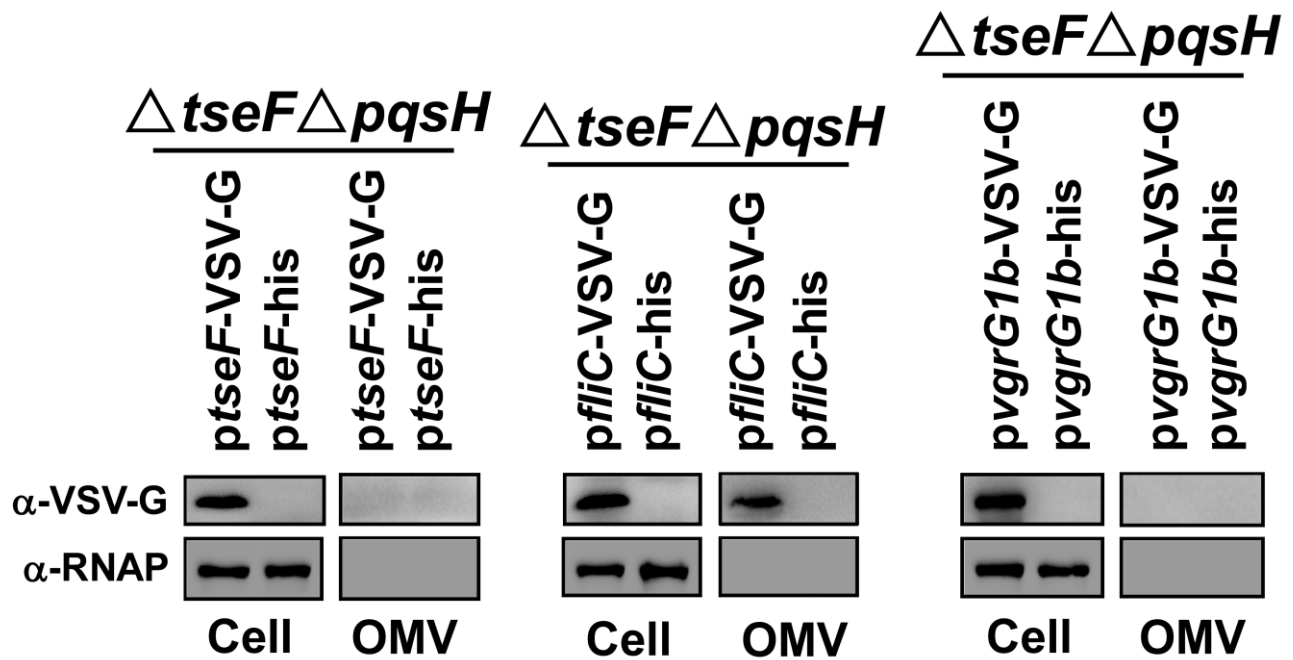

**Supplementary Figure 9.** The incorporation of TseF into OMVs is dependent on the interaction with PQS. OMVs prepared from the  $\Delta tseF\Delta pqsh$  mutant expressing TseF-VSV-G, FliC-VSV-G or VgrG1b-VSV-G and the proteins of interest were probed. The cytosolic RNA polymerase was detected as a control. Note that TseF-VSV-G was not present in OMVs purified from the  $\Delta tseF\Delta pqsh$  mutant expressing the fusion protein. Full blots are shown in Supplementary Fig. 14.

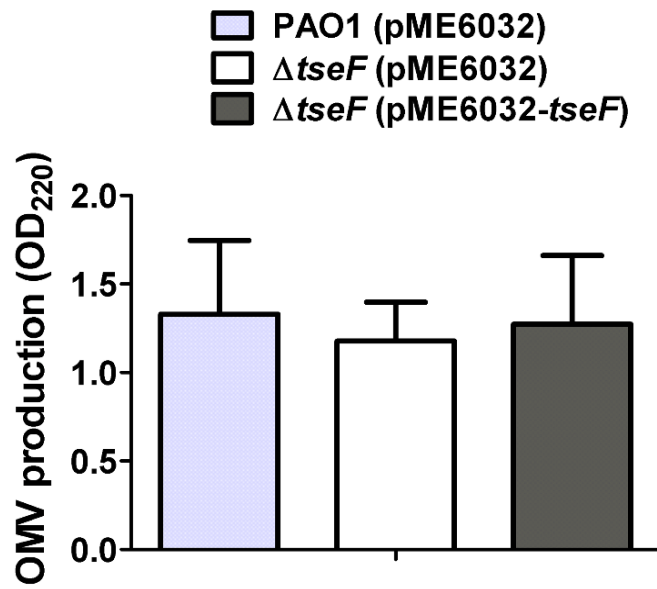

**Supplementary Figure 10. TseF is not important for the production of OMVs.** The production of OMVs by the indicated bacterial strains was evaluated after purification (see Methods). The bars represent three replicates; error bars indicate standard deviations.

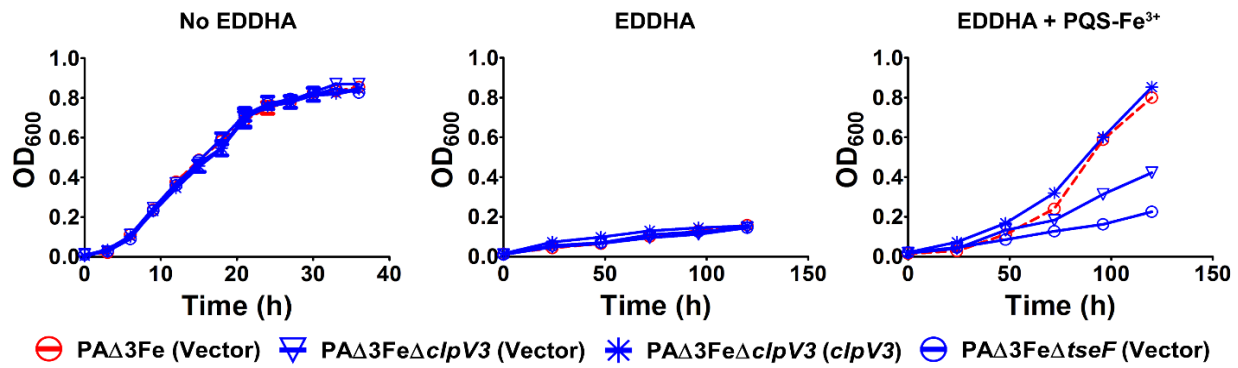

**Supplementary Figure 11. H3-T3SS is required for bacterial growth in an iron deficient medium.** Growth of the indicated bacterial strains in a medium supplemented with EDDHA (5  $\mu$ g/ml) was monitored. A medium without the iron chelator was set (left panel) as a control. The curves represent three replicates; error bars indicate standard deviations.

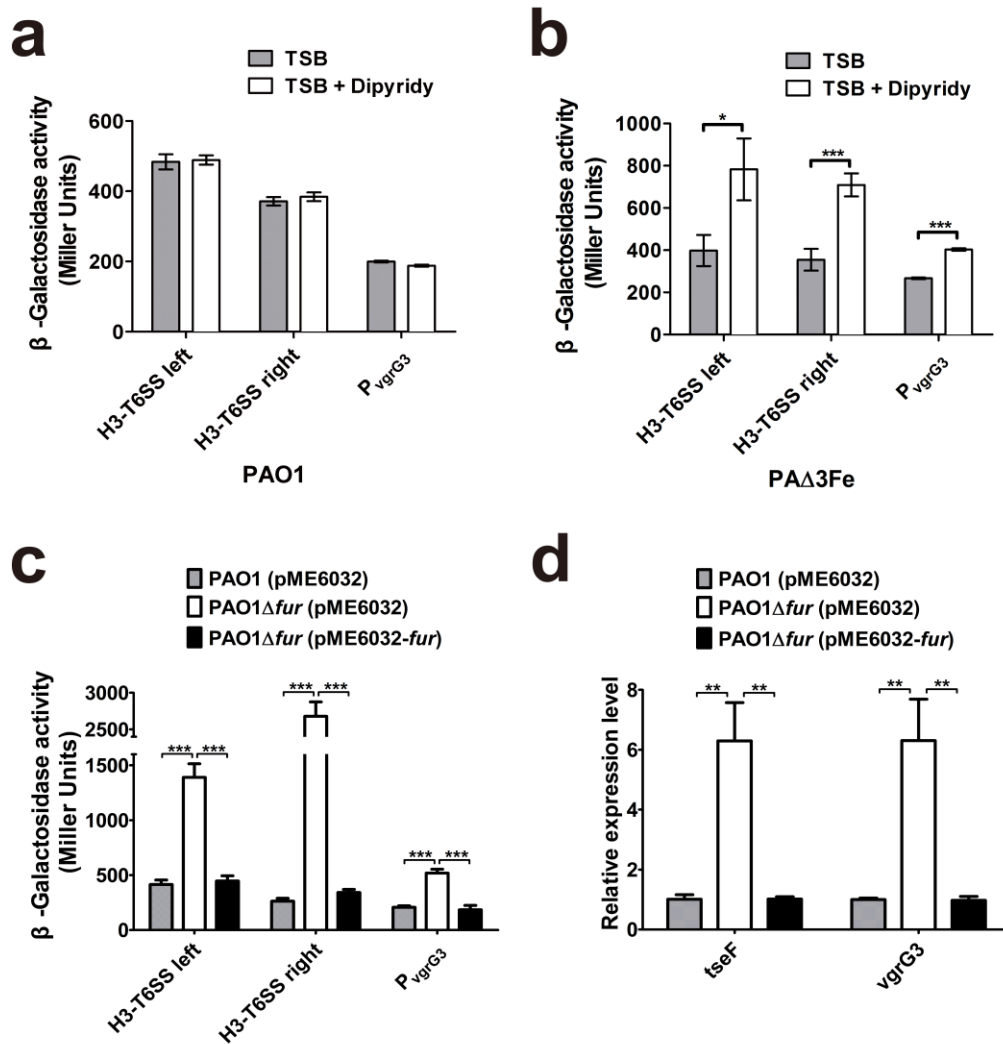

**Supplementary Figure 12. The expression of H3-T6SS was induced under iron-deficient conditions.** The expression of *lacZ* fused to the indicated promoters of the H3-T6SS was monitored under the indicated conditions. Both the P<sub>H3-T6SS left</sub> and P<sub>H3-T6SS right</sub> were induced by the iron chelator (a-b). (c) Fur repressed the expression of the H3-T6SS promoters. The expression of the *lacZ* fusions was measured in wild-type,  $\Delta fur$  and the complemented strain. (d) Expression of *tseF* is repressed by Fur. Total RNA was isolated from mid-exponential phase bacteria of wild-type,  $\Delta fur$  and the complemented strain and the expression of *tseF* and *vgrG* was evaluated by quantitative real-time PCR. Data shown were the average of three independent experiments; error bars indicate standard deviations. Differences between the expression levels were assessed by Student's *t*-test. \*,  $p < 0.05$ ; \*\*,  $p < 0.01$ ; \*\*\*,  $p < 0.001$ .

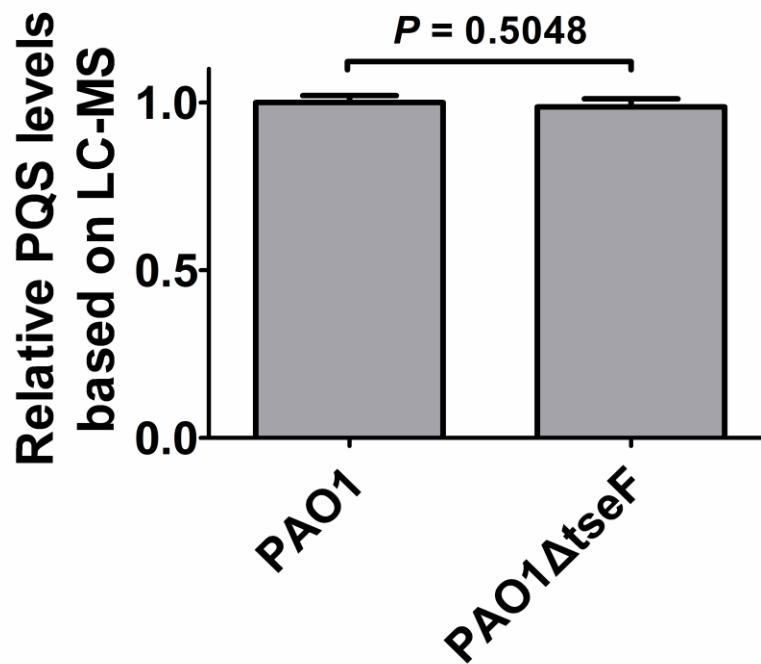

**Supplementary Figure 13.** The incorporation of PQS into OMVs is not dependent on **TseF**. The contents of PQS in OMVs prepared from PAO1 and the  $\Delta tseF$  mutant was determined by HPLC/MS. Differences between the PQS levels were assessed by Student's *t*-test to determine the significance.

Fig. 2a

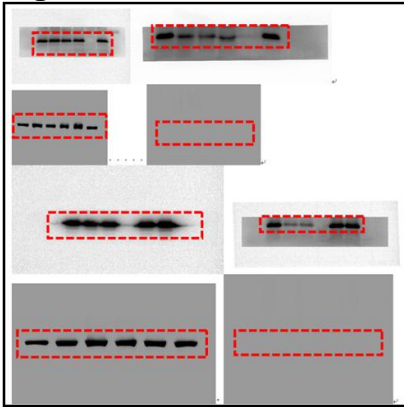

Fig. 3a

Fig. 2b

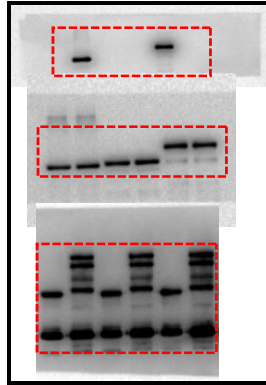

Fig. 3b

Suppl. Fig. 7

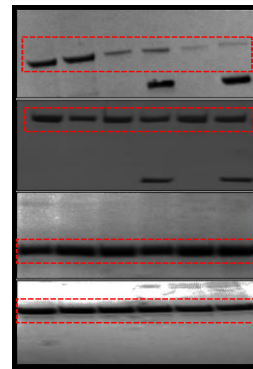

Fig. 3c

Fig. 3d

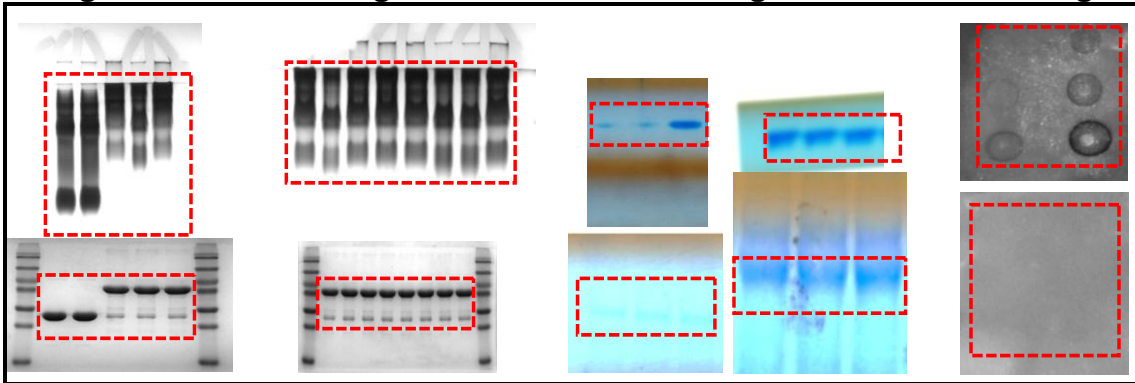

Fig. 4b

Fig. 4c

Fig. 5a

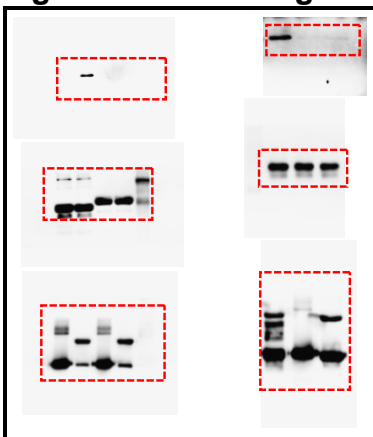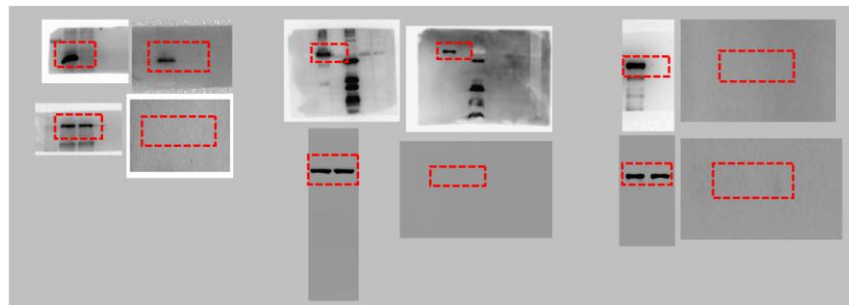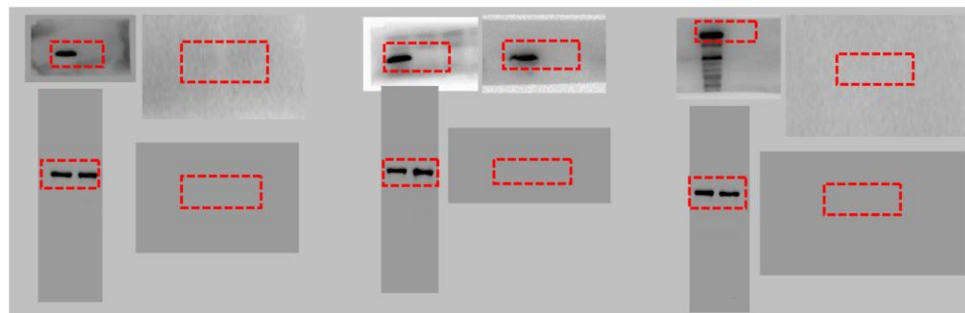

Suppl. Fig. 9

Supplementary Figure 14. Uncropped versions of all scans.

**Supplementary Table 1. Bacterial strains and plasmids used in this study.**

| Strains and plasmids                                      | Relevant characteristics*                                                        | Source           |
|-----------------------------------------------------------|----------------------------------------------------------------------------------|------------------|
| <b>Strains</b>                                            |                                                                                  |                  |
| <i>P. aeruginosa</i>                                      |                                                                                  |                  |
| PAO1                                                      | Wild-type                                                                        | Laboratory stock |
| $\Delta clpV3$                                            | <i>clpV3</i> deletion mutant in PAO1                                             | This study       |
| $\Delta hsiB3-C3$                                         | <i>hsiB3/hsiC3</i> double deletion mutant in PAO1                                | This study       |
| $\Delta hcp3$                                             | <i>hcp3</i> deletion mutant in PAO1                                              | This study       |
| $\Delta tseF$                                             | <i>tseF</i> deletion mutant in PAO1                                              | This study       |
| $\Delta pqsA$                                             | <i>pqsA</i> deletion mutant in PAO1                                              | This study       |
| $\Delta pqsH$                                             | <i>pqsH</i> deletion mutant in PAO1                                              | This study       |
| $\Delta pvdA$                                             | <i>pvdA</i> deletion mutant in PAO1                                              | This study       |
| $\Delta pchE$                                             | <i>pchE</i> deletion mutant in PAO1                                              | This study       |
| $\Delta feoB$                                             | <i>feoB</i> deletion mutant in PAO1                                              | This study       |
| $\Delta fptA$                                             | <i>fptA</i> deletion mutant in PAO1                                              | This study       |
| $\Delta oprF$                                             | <i>oprF</i> deletion mutant in PAO1                                              | This study       |
| $\Delta tseF\Delta pqsH$                                  | <i>tseF/pqsH</i> double deletion mutant in PAO1                                  | This study       |
| PA $\Delta$ 3Fe                                           | <i>pvdA/pchE/feoB</i> triple deletion mutant in PAO1                             | This study       |
| PA $\Delta$ 3Fe $\Delta$ tseF                             | <i>pvdA/pchE/feoB/tseF</i> deletion mutant in PAO1                               | This study       |
| PA $\Delta$ 3Fe $\Delta$ tseF $\Delta$ fptA               | <i>pvdA/pchE/feoB/tseF/fptA</i> deletion mutant in PAO1                          | This study       |
| PA $\Delta$ 3Fe $\Delta$ tseF $\Delta$ fptA $\Delta$ oprF | <i>pvdA/pchE/feoB/fptA/oprF/tseF</i> deletion mutant in PAO1                     | This study       |
| PA $\Delta$ 3Fe $\Delta$ clpV3                            | <i>pvdA/pchE/feoB/clpV3</i> deletion mutant in PAO1                              | This study       |
| $\Delta fur$                                              | <i>fur</i> deletion mutant in PAO1                                               | This study       |
| $\Delta lasRI\Delta rhIRI$                                | PAO1 $\Delta lasRI::Gm\Delta rhIRI::Tc$                                          | 1                |
| PAO1-64Z                                                  | PAO1 <i>attB::P<sub>H3-T6SS left</sub>-lacZ</i>                                  | This study       |
| PAO1-65Z                                                  | PAO1 <i>attB::P<sub>H3-T6SS right</sub>-lacZ</i>                                 | This study       |
| PAO1-G3Z                                                  | PAO1 <i>attB::P<sub>vgrG3</sub>-lacZ</i>                                         | This study       |
| PA $\Delta$ 3Fe-64Z                                       | PA $\Delta$ 3Fe <i>attB::P<sub>H3-T6SS left</sub>-lacZ</i>                       | This study       |
| PA $\Delta$ 3Fe-65Z                                       | PA $\Delta$ 3Fe <i>attB::P<sub>H3-T6SS right</sub>-lacZ</i>                      | This study       |
| PA $\Delta$ 3Fe-G3Z                                       | PA $\Delta$ 3Fe <i>attB::P<sub>vgrG3</sub>-lacZ</i>                              | This study       |
| $\Delta fur$ -64Z                                         | $\Delta fur$ <i>attB::P<sub>H3-T6SS left</sub>-lacZ</i>                          | This study       |
| $\Delta fur$ -65Z                                         | $\Delta fur$ <i>attB::P<sub>H3-T6SS right</sub>-lacZ</i>                         | This study       |
| $\Delta fur$ -G3Z                                         | $\Delta fur$ <i>attB::P<sub>vgrG3</sub>-lacZ</i>                                 | This study       |
| PAO1- <i>lacZ</i>                                         | PAO1 <i>attB::Ptac-lacZ</i>                                                      | This study       |
| PA $\Delta$ 3Fe- <i>lacZ</i>                              | PA $\Delta$ 3Fe <i>attB::Ptac-lacZ</i>                                           | This study       |
| <i>E. coli</i>                                            |                                                                                  |                  |
| BL21(DE3)                                                 | Host for expression vector pET28a/pGEX6p-1                                       | Novagen          |
| DH5 $\alpha$                                              | F $\Phi$ 80 $\Delta lacZ\Delta M15/\Delta(lacZYA-argF)U169recA1endA1hsdR17$      | Laboratory stock |
| S17-1                                                     | F $\Phi$ thi pro <i>hsdR</i> [RP4-2 Tc::Mu Km::Tn7 (Tp Sm)]                      | Laboratory stock |
| <b>Plasmids</b>                                           |                                                                                  |                  |
| pUTmini-Tn5- <i>luxCDABE</i> -Tc                          | mini-Tn5- <i>luxCDABE</i> -Tc delivery vector; Tc <sup>r</sup>                   | 2                |
| p34s-Gm                                                   | Gm resistant cassette carrying vector; Amp <sup>r</sup>                          | 3                |
| pK18 <i>mobsacB</i>                                       | <i>sacB</i> -based gene replacement vector; Km <sup>r</sup>                      | 4                |
| pK-V3                                                     | $\Delta clpV3::Gm$ in pK18 <i>mobsacB</i> ; Km <sup>r</sup> , Gm <sup>r</sup>    | This study       |
| pK-B3C3                                                   | $\Delta hsiB3-C3::Gm$ in pK18 <i>mobsacB</i> ; Km <sup>r</sup> , Gm <sup>r</sup> | This study       |
| pK-P3                                                     | $\Delta hcp3::Gm$ in pK18 <i>mobsacB</i> ; Km <sup>r</sup> , Gm <sup>r</sup>     | This study       |
| pK- <i>tseF</i>                                           | $\Delta tseF::Gm$ in pK18 <i>mobsacB</i> ; Km <sup>r</sup> , Gm <sup>r</sup>     | This study       |
| pK- <i>pqsA</i>                                           | $\Delta pqsA::Gm$ in pK18 <i>mobsacB</i> ; Km <sup>r</sup> , Gm <sup>r</sup>     | This study       |
| pK- <i>pqsH</i>                                           | $\Delta pqsH::Gm$ in pK18 <i>mobsacB</i> ; Km <sup>r</sup> , Gm <sup>r</sup>     | This study       |
| pK- <i>pvdA</i>                                           | $\Delta pvdA::Gm$ in pK18 <i>mobsacB</i> ; Km <sup>r</sup> , Gm <sup>r</sup>     | This study       |
| pK- <i>pchE</i>                                           | $\Delta pchE::Gm$ in pK18 <i>mobsacB</i> ; Km <sup>r</sup> , Gm <sup>r</sup>     | This study       |
| pK- <i>feoB</i>                                           | $\Delta feoB::Gm$ in pK18 <i>mobsacB</i> ; Km <sup>r</sup> , Gm <sup>r</sup>     | This study       |

|                                        |                                                                                                                                                     |            |
|----------------------------------------|-----------------------------------------------------------------------------------------------------------------------------------------------------|------------|
| pK- <i>fptA</i>                        | $\Delta fptA::Gm$ in pK18 <i>mobsacB</i> ; Km <sup>r</sup> , Gm <sup>r</sup>                                                                        | This study |
| pK- <i>oprF</i>                        | $\Delta oprF::Gm$ in pK18 <i>mobsacB</i> ; Km <sup>r</sup> , Gm <sup>r</sup>                                                                        | This study |
| pK- <i>fur</i>                         | $\Delta fur::Gm$ in pK18 <i>mobsacB</i> ; Km <sup>r</sup> , Gm <sup>r</sup>                                                                         | This study |
| pME6032                                | Shuttle vector containing <i>lacI</i> <sup>q</sup> - <i>Ptac</i> fragment for gene expression; source of <i>tetA</i> gene cassette, Tc <sup>r</sup> | 5          |
| pME6032- <i>tseF</i>                   | <i>tseF</i> cloned into pME6032 for complementation                                                                                                 | This study |
| pME6032- <i>pvdA</i>                   | <i>pvdA</i> cloned into pME6032 for complementation                                                                                                 | This study |
| pME6032- <i>fptA</i>                   | <i>fptA</i> cloned into pME6032 for complementation                                                                                                 | This study |
| pME6032- <i>oprF</i>                   | <i>oprF</i> cloned into pME6032 for complementation                                                                                                 | This study |
| pME6032- <i>tseF-fptA</i>              | <i>tseF</i> and <i>fptA</i> cloned into pME6032 for complementation                                                                                 | This study |
| pME6032- <i>tseF-oprF</i>              | <i>tseF</i> and <i>oprF</i> cloned into pME6032 for complementation                                                                                 | This study |
| pME6032- <i>clpV3</i>                  | <i>clpV3</i> cloned into pME6032 for complementation                                                                                                | This study |
| pME6032- <i>fur</i>                    | <i>fur</i> cloned into pME6032 for complementation                                                                                                  | This study |
| <i>ptseF</i> -VSV-G                    | pME6032 expressing <i>tseF</i> -VSV-G                                                                                                               | This study |
| <i>phcp3</i> -VSV-G                    | pME6032 expressing <i>hcp3</i> -VSV-G                                                                                                               | This study |
| <i>pvgrG3</i> -VSV-G                   | pME6032 expressing <i>vgrG3</i> -VSV-G                                                                                                              | This study |
| <i>pvgrG1b</i> -VSV-G                  | pME6032 expressing <i>vgrG1b</i> -VSV-G                                                                                                             | This study |
| <i>pvgrG1a</i> -VSV-G                  | pME6032 expressing <i>vgrG1a</i> -VSV-G                                                                                                             | This study |
| <i>pfliC</i> -VSV-G                    | pME6032 expressing <i>fliC</i> -VSV-G                                                                                                               | This study |
| <i>ptseF</i> -his                      | pME6032 expressing <i>tseF</i> -6×his                                                                                                               | This study |
| <i>pfliC</i> -his                      | pME6032 expressing <i>fliC</i> -6×his                                                                                                               | This study |
| <i>pvgrG1b</i> -his                    | pME6032 expressing <i>vgrG1b</i> -6×his                                                                                                             | This study |
| pBBR1MCS-5                             | Broad-host-range vector, Gm <sup>r</sup>                                                                                                            | 6          |
| pBBR1MCS-5- <i>clpV3</i>               | <i>clpV3</i> cloned into pBBR1MCS-5 under its native Shine-Dalgarno sequence for complementation                                                    | This study |
| pBBR1MCS-5- <i>tseF</i>                | <i>tseF</i> cloned into pBBR1MCS-5 under its native Shine-Dalgarno sequence for complementation                                                     | This study |
| pMini-CTX:: <i>lacZ</i>                | $\Omega$ - <i>FRT</i> - <i>attP</i> -MCS, <i>ori</i> , <i>int</i> , <i>oriT</i> , Tc <sup>r</sup>                                                   | 7,8        |
| pFLP2                                  | Source of Flp recombinase; Amp <sup>r</sup>                                                                                                         | 9          |
| pMP-64                                 | 508 bp upstream region of PA2364 ( <i>H3-T6SS left</i> ) in pMini-CTX:: <i>lacZ</i>                                                                 | This study |
| pMP-65                                 | 508 bp upstream region of PA2365 ( <i>H3-T6SS right</i> ) in pMini-CTX:: <i>lacZ</i>                                                                | This study |
| pMP-G3                                 | 1307 bp upstream region of <i>vgrG3</i> in pMini-CTX:: <i>lacZ</i>                                                                                  | This study |
| pMini-CTX-Ptac- <i>lacZ</i>            | 513 bp tac promoter region from pME6032 in pMini-CTX:: <i>lacZ</i>                                                                                  | This study |
| pET28a                                 | Expression vector with N-terminal hexahistidine affinity tag, Km <sup>r</sup>                                                                       | Novagen    |
| pET28a- <i>fur</i>                     | pET28a derivative for expression of <i>fur</i>                                                                                                      | This study |
| pET28a- <i>tseF</i>                    | pET28a carrying <i>tseF</i> coding region                                                                                                           | This study |
| pET28a- <i>oprF</i>                    | pET28a carrying <i>oprF</i> coding region                                                                                                           | This study |
| pET28a- <i>atpA</i>                    | pET28a carrying <i>atpA</i> coding region                                                                                                           | This study |
| pGEX6p-1                               | Expression vector with N-terminal GST tag, Amp <sup>r</sup>                                                                                         | Novagen    |
| pGEX6p-1- <i>tseF</i>                  | pGEX6p-1 carrying <i>tseF</i> coding region                                                                                                         | This study |
| pGEX6p-1-PA4426                        | pGEX6p-1 carrying PA4426 coding region                                                                                                              | This study |
| pGEX6p-1- <i>fptA</i> <sub>1-186</sub> | pGEX6p-1 carrying the first 186 codons of <i>fptA</i>                                                                                               | This study |
| pGEX6p-1-PA0533                        | pGEX6p-1 carrying PA0533 coding region                                                                                                              | This study |

\*Tc<sup>r</sup>, Gm<sup>r</sup>, Km<sup>r</sup> and Amp<sup>r</sup> represent resistance to tetracycline, gentamicin, kanamycin and ampicillin, respectively.



**Supplementary Table 2. Primers used in this study.**

| Primers       | 5'-3' sequence*                       |                                   |
|---------------|---------------------------------------|-----------------------------------|
| ClpV3 up F    | CGTGTCTCTAGACCTGTTCCAGCACCGCTGCTCAG   | To generate pK-V3                 |
| ClpV3 up R    | GCTTCCTCCAGGTCGATGTCCAGCAGCTCCAGCAG   |                                   |
| ClpV3 low F   | CTGGACATCGACCTGGAGGAAGCCACCCTGGAAGG   |                                   |
| ClpV3 low R   | CACGACAAGCTTGCCGTCGGCAAACCTTTTCGGTAC  |                                   |
| HsiB3-C3up F  | TGTCTCTAGATCATACTGACTCCCCTTCGACG      | To generate pK-B3C3               |
| HsiB3-C3up R  | CTCGAGCTGGAAGTGCAGCTCCTTCTTCTCGATGGC  |                                   |
| HsiB3-C3low F | GAGCTGCACTTCCAGCTCGAGGAACTCAG         |                                   |
| HsiB3-C3low R | TGACAAGCTTGAGCCGTAGGCGAGGATG          |                                   |
| Hcp3 up F     | CGTGTCTCTAGACACTCCAAGTACCTCTGGGGCAACG | To generate pK-P3                 |
| Hcp3 up R     | GCGGTCAGCTCCAGGCTGTCGCCTTTGATGTCGCTGC |                                   |
| Hcp3 low F    | GGCGACAGCCTGGAGCTACCGCGCAGAAGGACGAC   |                                   |
| Hcp3 low R    | CACGACAAGCTTCTCGAACTGGACGATCGCGCAGGAC |                                   |
| TseF up F     | CTCGTCTAGACGACAACGCCCTGCCCTAC         | To generate pK-tseF               |
| TseF up R     | CAGCGCCAGCGGTCGCCACGAACCAGGTCGAG      |                                   |
| TseF low F    | CGTGGCGACCGCTGGCGCTGGTGGTGGAC         |                                   |
| TseF low R    | CTCGAAGCTTTGCGGGGAGGCTTCTTGTC         |                                   |
| PqsA up F     | CTCGAGATCTCTCGCCAGTGTACTACG           | To generate pK-pqsA               |
| PqsA up R     | GATAAAGGGTGTCCGAAGGCGAGTCGTTCAAC      |                                   |
| PqsA low F    | CTCGCCTTCGGACACCCTTATCACGACAAC        |                                   |
| PqsA low R    | CTCGAAGCTTGACAGCAGTTCATCCAGAC         |                                   |
| PqsH up F     | CTCGAGATCTACGGCGAGGTAGTTGTTG          | To generate pK-pqsH               |
| PqsH up R     | CCTCAGCTCGACCAGCAGCCAGTCGATG          |                                   |
| PqsH low F    | GCTGCTGGTCGAGCTGAGGAATACCCTCGTTC      |                                   |
| PqsH low R    | CTCGAAGCTTGCGAAGACCTGGCGAATC          |                                   |
| PvdA up F     | CTCGGAATTCACAGGCTCGGGGATCGAC          | To generate pK-pvdA               |
| PvdA up R     | GTGTCGCTGAGCTGCTTGTCCAGGAACAGCAC      |                                   |
| PvdA low F    | GACAAGCAGCTCAGCGACACCCTGCTGTC         |                                   |
| PvdA low R    | CTCGTCTAGAGGTCATCGGTCGCGATGG          |                                   |
| PchE up F     | CTCGTCTAGAACCCGCGATCTCTACCTC          | To generate pK-pchE               |
| PchE up R     | GCTCGCCTCGCGTTCCTGCAGGTACATC          |                                   |
| PchE low F    | GCAGGAACGCGAGGCGAGCTTCTTCAG           |                                   |
| PchE low R    | CTCGAAGCTTTCCCGGCCGATACTCAG           |                                   |
| FeoB up F     | CTCGGAATTCGTATTGCGCAGCCAGCTC          | To generate pK-feoB               |
| FeoB up R     | GCTACGCTCGTGACGGACGGTATGGAAC          |                                   |
| FeoB low F    | CGTCCGTACAGAGCGTAGCGTCTGACC           |                                   |
| FeoB low R    | CTCGAAGCTTCGGCATCGCTTTCATCTG          |                                   |
| FptA up F     | CTCGGAATTCGCCAGTCGTAACCTGGTG          | To generate pK-fptA               |
| FptA up R     | CTTGTAGCCCGTGCTTTCTCCGCTGATC          |                                   |
| FptA low F    | GAGAAAGCACGGGCTACAAGATCGACGAGCAC      |                                   |
| FptA low R    | CTCGAAGCTTAAGCCGACGAACAGGCTC          |                                   |
| OprF up F     | CTCGTCTAGATTTCCGATGAAGAGCTGG          | To generate pK-oprF               |
| OprF up R     | CACCGTACTCGAAGGCTTCGATCTCTACC         |                                   |
| OprF low F    | GAAGCCTTCGAGTACGGTGTAGAAGGTG          |                                   |
| OprF low R    | CTCGAAGCTTGAGCATACTGGAGCACTG          |                                   |
| Fur up F      | CGTGTCTCTAGAGCCGAGGGTTTCTGCGGAAATG    | To generate pK-fur                |
| Fur up R      | CCGCGCTCCACTTTAAGGCCGGCTTTTCGAAGTTCGC |                                   |
| Fur low F     | GGCCTTAAAGTGGAGCGCGGCTTCGAGCTGGTCGATC |                                   |
| Fur low R     | CACGACAAGCTTGGGCGACGAGCTGGCCGCCTAC    |                                   |
| TseF F        | CTCGGAATTCATGGCGGCATCCGGCAAG          | To generate pME6032-tseF          |
| TseF XhoI R   | CTCGCTCGAGGATGCGCGCCTAGGGCTC          |                                   |
| PvdA EcoRI    | CTCGGAATTCATGACTCAGGCACTGCAAC         | To generate pME6032-pvdA          |
| PvdA XhoI     | CTCGCTCGAGGTGGCGCCGATCAGTGG           |                                   |
| FptA F        | CTCGGAGCTTCCCCCGAGGCTGTTTCAACG        | To generate pME6032-fptA          |
| FptA XhoI R   | CTCGCTCGAGTGGCGCGCATCAGAACG           |                                   |
| OprF F        | CTCGGAGCTCGGACAACCTAAGTACCATC         | To generate pME6032-oprF          |
| OprF XhoI R   | CTCGCTCGAGGCTCAGCCGATTACTTGG          |                                   |
| TseF F        | CTCGGAATTCATGGCGGCATCCGGCAAG          | To generate pME6032-tseF-fptA and |

|                      |                                                                            |                                            |
|----------------------|----------------------------------------------------------------------------|--------------------------------------------|
| TseF SacI R          | CTCGGAGCTCGATGCGCGCCTAGGGCTC                                               | pME6032- <i>tseF-oprF</i>                  |
| FptA F               | CTCGGAGCTCTCCCCGAGGCTGTTCGAACG                                             |                                            |
| FptA XhoI R          | CTCGCTCGAGTGGCGCGGCATCAGAACG                                               |                                            |
| OprF F               | CTCGGAGCTCGGACAACACTGACCATC                                                |                                            |
| OprF XhoI R          | CTCGCTCGAGGCTCAGCCGATTACTTGG                                               |                                            |
| ClpV3 F              | CTCGGAATTCATGGAACCTCGCCGCCCTG                                              | To generate<br>pME6032- <i>clpV3</i>       |
| ClpV3 R              | CTCGAGATCTGTCTACTCCAACACCCACTCC                                            |                                            |
| FurC F EcoRI         | CTCGGAATTCATGTTGAAAATAGCGAACTTC                                            | To generate pME6032- <i>fur</i>            |
| FurC R BglII         | CTCGAGATCTGTTGCGCGACTACTTCTTC                                              |                                            |
| TseF F               | CTCGGAATTCATGGCGGCATCCGGCAAG                                               | To generate<br><i>ptseF</i> -VSV-G         |
| TseF-VSVG R          | CTCGAGATCTTCATTTTCCTAATCTATTCATTCAATATCTGTAT<br>AGGGCTCCGCCAGCCTGGTC       |                                            |
| Hcp3 F               | CTCGGAGCTCAGCCCCCTCTCCAGGAGTC                                              | To generate<br><i>phcp3</i> -VSV-G         |
| Hcp3 R               | CTCGAGATCTTCATTTTCCTAATCTATTCATTCAATATCTGTAT<br>ACTTGACCAACTGGTTGGC        |                                            |
| VgrG3 F              | CTCGGAATTCATGCCCCGTCCCACCGAC                                               | To generate<br><i>pvgrG3</i> -VSV-G        |
| VgrG3 R              | CTCGGGATCCTCATTTTCCTAATCTATTCATTCAATATCTGTAT<br>AGTTGACCTTTACCAGGCCGCCCTTG |                                            |
| VgrG1b EcoRI         | CTCGGAATTCATGGCACTTGCGCAACAG                                               | To generate<br><i>pvgrG1b</i> -VSV-G       |
| VgrG1b-VSVG XhoI     | CTCGCTCGAGTCATTTTCCTAATCTATTCATTCAATATCTGTAT<br>AGTTCTGGAGGATCTTGCGTC      |                                            |
| VgrG1a EcoRI         | CTCGGAATTCATGCAACTGACCCGCCCTG                                              | To generate<br><i>pvgrG1a</i> -VSV-G       |
| VgrG1a-VSVG<br>BamHI | CTCGGGATCCTCATTTTCCTAATCTATTCATTCAATATCTGTAT<br>ACGGCGGAAACATCGCCTG        |                                            |
| FliC EcoRI           | CTCGGAATTCATGGCCCTTACAGTCAACAC                                             | To generate<br><i>pfliC</i> -VSV-G         |
| FliC-VSVG BamHI      | CTCGGGATCCTCATTTTCCTAATCTATTCATTCAATATCTGTAT<br>AGCGCAGCAGGCTCAGGAC        |                                            |
| TseF F               | CTCGGAATTCATGGCGGCATCCGGCAAG                                               | To generate<br><i>ptseF</i> -his           |
| TseF-his R           | CTCGAGATCTTCAATGATGATGATGATGATGGGGCTCCGCCAG<br>CCTGGTC                     |                                            |
| VgrG1b EcoRI         | CTCGGAATTCATGGCACTTGCGCAACAG                                               | To generate<br><i>pvgrG1b</i> -his         |
| VgrG1b-his XhoI      | CTCGCTCGAGTCAATGATGATGATGATGATGGTTCTGGAGGAT<br>CTTGCGTC                    |                                            |
| FliC EcoRI           | CTCGGAATTCATGGCCCTTACAGTCAACAC                                             | To generate<br><i>pfliC</i> -his           |
| FliC-his BamHI       | CTCGGGATCCTCAATGATGATGATGATGATGGCGCAGCAGGCT<br>CAGGAC                      |                                            |
| ClpV3 EcoRI          | CTCGGAATTCCTGCGGCAGCCGGAGGTAG                                              | To generate<br>pBBR1MCS-5- <i>clpV3</i>    |
| ClpV3 R              | CTCGAGATCTGTCTACTCCAACACCCACTCC                                            |                                            |
| TseF EcoRI           | CTCGGAATTCAGGTCAACTGAGGAGAAGCG                                             | pBBR1MCS-5- <i>tseF</i>                    |
| TseF low             | CTCGAGATCTGATGCGCGCCTAGGGCTC                                               |                                            |
| P2364-300F           | TGTCGGTACCGAAGCGCAGCTCGACGTTT                                              | To generate pMP-64                         |
| P2364-300R           | TGTCGAATTCGGGACCAGCTCCAGGCTC                                               |                                            |
| P2365-300F           | TGTCGGTACCCGGGACCAGCTCCAGGCTC                                              | To generate pMP-65                         |
| P2365-300R           | TGTCGAATTCGAAGCGCAGCTCGACGTTT                                              |                                            |
| P2373-1322           | CCTGCTCGAGATCCTCGCCACCAGCAAC                                               | To generate pMP-G3                         |
| P2373 low            | TGTCCTGCAGGGTGGGACGGGGCATTAGTG                                             |                                            |
| Ptac KpnI            | CTCGGGTACCCGCTTCCACTTTTTCCC                                                | To generate<br>pMini-CTX-Ptac- <i>lacZ</i> |
| Ptac EcoRI           | GAGCTCGAATTCCTGTTTCCTGTG                                                   |                                            |

|                    |                                  |                                                    |
|--------------------|----------------------------------|----------------------------------------------------|
| Fur F NdeI         | CACCTCGCATATGGTTGAAAATAGCGAACTTC | To generate pET28a- <i>fur</i>                     |
| Fur R HindIII      | CTCGAAGCTTGTTCGCGACTACTTCTTC     |                                                    |
| TseFE F            | GGACTCGCATATGGCGGCATCCGGCAAG     | To generate pET28a- <i>tseF</i>                    |
| TseFE R            | CTCGAAGCTTGATGCGGCCTAGGGCTC      |                                                    |
| OprF BamHI F       | CTCGGGATCCATGAAACTGAAGAACACCTTAG | To generate pET28a- <i>oprF</i>                    |
| OprF XhoI R        | CTCGCTCGAGGCTCAGCCGATTACTTGG     |                                                    |
| AtpA BamHI F       | CTCGGGATCCATGCAGCAACTCAATCCTTC   | To generate pET28a- <i>atpA</i>                    |
| AtpA XhoI R        | CTCGCTCGAGTGCGGCTTACCAGGTTTG     |                                                    |
| TseF BamHI F       | CTCGGGATCCATGGCGGCATCCGGCAAG     | To generate pGEX6p-1- <i>tseF</i>                  |
| TseF XhoI R        | CTCGCTCGAGGATGCGGCCTAGGGCTC      |                                                    |
| PA4426 BamHI F     | CTCGGGATCCATGAGCCGTACCGCCTTC     | To generate pGEX6p-1-PA4426                        |
| PA4426 XhoI R      | CTCGCTCGAGTCGTTTCGCTGTTCTTCAG    |                                                    |
| FptA BamHI F       | CTCGGGATCCATGAAAACGGAGACGAAGGTG  | To generate pGEX6p-1- <i>fptA</i> <sub>1-186</sub> |
| FptA 186 XhoI R    | CTCGCTCGAGTCATTCGCGCTGCGGCCGCTTG |                                                    |
| PA0533 BamHI       | CTCGGGATCCATGAACGACCAGGTACTG     | To generate pGEX6p-1-PA0533                        |
| PA0533 XhoI        | CTCGCTCGAGCCCTCTTCGTTTATTGTC     |                                                    |
| 2373-qRT-F         | TTCGAGGACAAGAAGGAC               | For RT-PCR                                         |
| 2373-qRT-R         | GTCGTTGAGCACGTTGAC               |                                                    |
| 2374-qRT-F         | CGCACTACCGCAACGGGGCTG            |                                                    |
| 2374-qRT-R         | TAATGCTCGCGCTCGGCCACC            |                                                    |
| <i>rpoD</i> -qRT-F | AGGGATACCTGACTTACG               |                                                    |
| <i>rpoD</i> -qRT-R | GATGTCTTCCACCTGTTC               |                                                    |
| IPCer primer 1     | GACATGCGGATGTTATTGTGCTTGGG       | For inverse PCR                                    |
| IPCer primer 2     | GATCCCCGGGTACCGAGCTCGAATTC       |                                                    |
| Sequencing primer  | CCGGGTACCGAGCTCGAATTCG           |                                                    |

\*Underlined sites indicate restriction enzyme cutting sites added for cloning.

## Supplementary References

1. Beatson, S. A., Whitchurch, C. B., Semmler, A. B., Mattick, J. S. Quorum sensing is not required for twitching motility in *Pseudomonas aeruginosa*. *J. Bacteriol.* **184**, 3598-3604 (2002)
2. Winson, M. K. *et al.* Engineering the *luxCDABE* genes from *Photobacterium luminescens* to provide a bioluminescent reporter for constitutive and promoter probe plasmids and mini-Tn5 constructs. *FEMS Microbiol. Lett.* **163**, 193-202 (1998)
3. Dennis, J. J. & Zylstra, G. J. Plasposons: modular self-cloning minitransposon derivatives

- for rapid genetic analysis of gram-negative bacterial genomes. *Appl. Environ. Microbiol.* **64**, 2710-2715 (1998)
4. Schafer, A., *et al.* Small mobilizable multi-purpose cloning vectors derived from the *Escherichia coli* plasmids pK18 and pK19: selection of defined deletions in the chromosome of *Corynebacterium glutamicum*. *Gene* **145**, 69-73 (1994)
  5. Heeb, S., Blumer, C. & Haas, D. Regulatory RNA as mediator in GacA/RsmA-dependent global control of exoproduct formation in *Pseudomonas fluorescens* CHA0. *J. Bacteriol.* **184**, 1046–1056 (2002)
  6. Kovach, M. E., *et al.* Four new derivatives of the broad-host-range cloning vector pBBR1MCS, carrying different antibiotic-resistance cassettes. *Gene* **166**, 175-176. (1995)
  7. Becher, A. & Schweizer, H. P. Integration-proficient *Pseudomonas aeruginosa* vectors for isolation of single-copy chromosomal *lacZ* and *lux* gene fusions. *Biotechniques* **29**, 948-950, 952 (2000).
  8. Hoang, T. T., Kutchma, A. J., Becher, A. & Schweizer, H. P. Integration-proficient plasmids for *Pseudomonas aeruginosa*: site-specific integration and use for engineering of reporter and expression strains. *Plasmid* **43**, 59-72 (2000).
  9. Hoang, T. T., Karkhoff-Schweizer RR, Kutchma, A. J. & Schweizer, H. P. A broad-host-range Flp-FRT recombination system for site-specific excision of chromosomally-located DNA sequences: application for isolation of unmarked *Pseudomonas aeruginosa* mutants. *Gene* **212**, 77-86 (1998).
